# Supplementary material
Source: Elsevier journal article supplement (https://www.sciencedirect.com/science/article/pii/S2173579421001766)
Supplement: mmc1 [file S2173579421001766:mmc1.docx]

| **PROTOCOLO DE BÚSQUEDA** | **METODOLOGÍA PICO** | **CRITERIOS INCLUSIÓN/EXCLUSIÓN** |
| --- | --- | --- |
| 1. Macular Degeneration AND Macular Degeneration, Age-Related AND Acquired Human Immunodeficiency Syndrome AND Acquired Immunodeficiency Syndrome AND AIDS AND HIV AND Human Immunodeficiency Virus 2. Macular Degeneration OR Macular Degeneration, Age-Related AND Acquired Human Immunodeficiency Syndrome AND Acquired Immunodeficiency Syndrome AND AIDS AND HIV AND Human Immunodeficiency Virus 3. Macular Degeneration AND Acquired Human Immunodeficiency Syndrome 4. Macular Degeneration AND Acquired Immunodeficiency Syndrome 5. Macular Degeneration AND AIDS 6. Macular Degeneration AND HIV 7. Macular Degeneration AND Human Immunodeficiency Virus 8. Macular Degeneration, Age-Related AND Acquired Human Immunodeficiency Syndrome 9. Macular Degeneration, Age-Related AND Acquired Immunodeficiency Syndrome 10. Macular Degeneration, Age-Related AND AIDS 11. Macular Degeneration, Age-Related AND HIV 12. Macular Degeneration, Age-Related AND Human Immunodeficiency Virus 13. Macular Degeneration OR Macular Degeneration, Age-Related OR Retina OR Optic Nerve OR Nerve Fibers AND Acquired Human Immunodeficiency Syndrome OR Acquired Immunodeficiency Syndrome AND Contrast sensitivity NOT Cytomegalovirus NOT Opportunistic Infections NOT Herpes Zoster Ophthalmicus NOT Cytomegalovirus Retinitis NOT Ocular Syphilis  14. Macular Degeneration OR Macular Degeneration, Age-Related OR Retina OR Optic Nerve OR Nerve Fibers AND Acquired Human Immunodeficiency Syndrome OR Acquired Immunodeficiency Syndrome AND Visual Fields NOT Cytomegalovirus NOT Opportunistic Infections NOT Herpes Zoster Ophthalmicus NOT Cytomegalovirus Retinitis NOT Ocular Syphilis 15. Macular Degeneration OR Macular Degeneration, Age-Related OR Retina OR Optic Nerve OR Nerve Fibers AND Acquired Human Immunodeficiency Syndrome OR Acquired Immunodeficiency Syndrome AND Color Vision NOT Cytomegalovirus NOT Opportunistic Infections NOT Herpes Zoster Ophthalmicus NOT Cytomegalovirus Retinitis NOT Ocular Syphilis 16. Macular Degeneration OR Macular Degeneration, Age-Related OR Retina OR Optic Nerve OR Nerve Fibers AND AIDS AND Contrast sensitivity NOT Cytomegalovirus NOT Opportunistic Infections NOT Herpes Zoster Ophthalmicus NOT Cytomegalovirus Retinitis NOT Ocular Syphilis  17. Macular Degeneration OR Macular Degeneration, Age-Related OR Retina OR Optic Nerve OR Nerve Fibers AND AIDS AND Visual Fields NOT Cytomegalovirus NOT Opportunistic Infections NOT Herpes Zoster Ophthalmicus NOT Cytomegalovirus Retinitis NOT Ocular Syphilis 18. Macular Degeneration OR Macular Degeneration, Age-Related OR Retina OR Optic Nerve OR Nerve Fibers AND AIDS AND Color Vision NOT Cytomegalovirus NOT Opportunistic Infections NOT Herpes Zoster Ophthalmicus NOT Cytomegalovirus Retinitis NOT Ocular Syphilis  19. Macular Degeneration OR Macular Degeneration, Age-Related OR Retina OR Optic Nerve OR Nerve Fibers AND HIV AND Contrast sensitivity NOT Cytomegalovirus NOT Opportunistic Infections NOT Herpes Zoster Ophthalmicus NOT Cytomegalovirus Retinitis NOT Ocular Syphilis  20. Macular Degeneration OR Macular Degeneration, Age-Related OR Retina OR Optic Nerve OR Nerve Fibers AND HIV AND Visual Fields NOT Cytomegalovirus NOT Opportunistic Infections NOT Herpes Zoster Ophthalmicus NOT Cytomegalovirus Retinitis NOT Ocular Syphilis 21. Macular Degeneration OR Macular Degeneration, Age-Related OR Retina OR Optic Nerve OR Nerve Fibers AND HIV AND Color Vision NOT Cytomegalovirus NOT Opportunistic Infections NOT Herpes Zoster Ophthalmicus NOT Cytomegalovirus Retinitis NOT Ocular Syphilis 22. Macular Degeneration OR Macular Degeneration, Age-Related OR Retina OR Optic Nerve OR Nerve Fibers AND Human Immunodeficiency Virus AND Contrast sensitivity NOT Cytomegalovirus NOT Opportunistic Infections NOT Herpes Zoster Ophthalmicus NOT Cytomegalovirus Retinitis NOT Ocular Syphilis 23. Macular Degeneration OR Macular Degeneration, Age-Related OR Retina OR Optic Nerve OR Nerve Fibers AND Human Immunodeficiency Virus AND Visual Fields NOT Cytomegalovirus NOT Opportunistic Infections NOT Herpes Zoster Ophthalmicus NOT Cytomegalovirus Retinitis NOT Ocular Syphilis 24. Macular Degeneration OR Macular Degeneration, Age-Related OR Retina OR Optic Nerve OR Nerve Fibers AND Human Immunodeficiency Virus AND Color Vision NOT Cytomegalovirus NOT Opportunistic Infections NOT Herpes Zoster Ophthalmicus NOT Cytomegalovirus Retinitis NOT Ocular Syphilis 25. Macular Degeneration OR Macular Degeneration, Age-Related OR Retina OR Optic Nerve OR Nerve Fibers AND Acquired Human Immunodeficiency Syndrome OR Acquired Immunodeficiency Syndrome OR AIDS AND Scanning Laser Polarimetry NOT Cytomegalovirus NOT Opportunistic Infections NOT Herpes Zoster Ophthalmicus NOT Cytomegalovirus Retinitis NOT Ocular Syphilis 26. Macular Degeneration OR Macular Degeneration, Age-Related OR Retina OR Optic Nerve OR Nerve Fibers AND Acquired Human Immunodeficiency Syndrome OR Acquired Immunodeficiency Syndrome OR AIDS AND Tomography, Optical Coherence NOT Cytomegalovirus NOT Opportunistic Infections NOT Herpes Zoster Ophthalmicus NOT Cytomegalovirus Retinitis NOT Ocular Syphilis 27. Macular Degeneration OR Macular Degeneration, Age-Related OR Retina OR Optic Nerve OR Nerve Fibers AND Acquired Human Immunodeficiency Syndrome OR Acquired Immunodeficiency Syndrome OR AIDS AND Electroretinography NOT Cytomegalovirus NOT Opportunistic Infections NOT Herpes Zoster Ophthalmicus NOT Cytomegalovirus Retinitis NOT Ocular Syphilis 28. Macular Degeneration OR Macular Degeneration, Age-Related OR Retina OR Optic Nerve OR Nerve Fibers AND Acquired Human Immunodeficiency Syndrome OR Acquired Immunodeficiency Syndrome OR AIDS AND Fluorescein Angiography NOT Cytomegalovirus NOT Opportunistic Infections NOT Herpes Zoster Ophthalmicus NOT Cytomegalovirus Retinitis NOT Ocular Syphilis 29. Macular Degeneration OR Macular Degeneration, Age-Related OR Retina OR Optic Nerve OR Nerve Fibers AND HIV OR Human Immunodeficiency Virus AND Scanning Laser Polarimetry NOT Cytomegalovirus NOT Opportunistic Infections NOT Herpes Zoster Ophthalmicus NOT Cytomegalovirus Retinitis NOT Ocular Syphilis 30. Macular Degeneration OR Macular Degeneration, Age-Related OR Retina OR Optic Nerve OR Nerve Fibers AND HIV OR Human Immunodeficiency Virus AND Tomography, Optical Coherence NOT Cytomegalovirus NOT Opportunistic Infections NOT Herpes Zoster Ophthalmicus NOT Cytomegalovirus Retinitis NOT Ocular Syphilis 31. Macular Degeneration OR Macular Degeneration, Age-Related OR Retina OR Optic Nerve OR Nerve Fibers AND HIV OR Human Immunodeficiency Virus AND Electroretinography NOT Cytomegalovirus NOT Opportunistic Infections NOT Herpes Zoster Ophthalmicus NOT Cytomegalovirus Retinitis NOT Ocular Syphilis 32. Macular Degeneration OR Macular Degeneration, Age-Related OR Retina OR Optic Nerve OR Nerve Fibers AND HIV OR Human Immunodeficiency Virus AND Fluorescein Angiography NOT Cytomegalovirus NOT Opportunistic Infections NOT Herpes Zoster Ophthalmicus NOT Cytomegalovirus Retinitis NOT Ocular Syphilis 33. Macular Degeneration OR Macular Degeneration, Age-Related OR Retina OR Optic Nerve OR Nerve Fibers AND Acquired Human Immunodeficiency Syndrome OR Acquired Immunodeficiency Syndrome OR AIDS OR HIV OR Human Immunodeficiency Virus AND Contrast sensitivity AND Visual Fields AND Color Vision NOT Cytomegalovirus NOT Opportunistic Infections NOT Herpes Zoster Ophthalmicus NOT Cytomegalovirus Retinitis NOT Ocular Syphilis 34. Macular Degeneration OR Macular Degeneration, Age-Related OR Retina OR Optic Nerve OR Nerve Fibers AND Acquired Human Immunodeficiency Syndrome OR Acquired Immunodeficiency Syndrome OR AIDS OR HIV OR Human Immunodeficiency Virus AND Scanning Laser Polarimetry AND Tomography, Optical Coherence AND Electroretinography AND Fluorescein Angiography NOT Cytomegalovirus NOT Opportunistic Infections NOT Herpes Zoster Ophthalmicus NOT Cytomegalovirus Retinitis NOT Ocular Syphilis | **Pregunta clínica de interés:** Cual es la asociación entre HIV/Sindrome de Inmunodeficiencia Adquirida y la enfermedad neurorretiniana de etiología no infecciosa no oportunista? **Tipos de participantes:** población con Virus de la inmunodeficiencia adquirida o Sindrome de Inmunodeficiencia adquirida en tratamiento antiretroviral o no; sin ningún factor de riesgo o enfermedad oportunista adicional para presentar enfermedad neurorretiniana no infecciosa **Tipos de intervenciones:** análisis cualitativo de los datos mediante una revisión sistemática **Tipos de comparaciones**: Personas con Virus de la inmunodeficiencia adquirida o Sindrome de Inmunodeficiencia adquirida en tratamiento antiretroviral o no Versus personas sin Virus de la inmunodeficiencia adquirida o Sindrome de Inmunodeficiencia adquirida sin ningún otro factor de riesgo ni infección oportunista para desarrollar enfermedad neurorretiniana no infecciosa no oportunista  **Resultados de interés:** existe una asociación positiva o negativa entre HIV/AIDS y la enfermedad neurorretiniana no infecciosa no oportunista Tipos de estudios o diseños de investigación incluidos: Estudios originales observacionales o experimentales | Se determinaron los siguientes criterios de Inclusión y Exclusión que fueron consensuados por 2 personas encargadas de seleccionar los artículos durante su búsqueda en las respectivas bases de datos: **Criterios de inclusión:** A. El estudio establece directa o indirectamente asociación positiva o negativa entre la enfermedad neurorretiniana no infecciosa no oportunista y el HIV/AIDS  B. El tipo de publicación es bibliografía adecuada para una revisión sistemática (Estudios observacionales/ Estudios experimentales / Revisiones sistemáticas / Metaanálisis)  **Criterios de Exclusión:** A.El estudio no establece directa ni indirectamente asociación positiva o negativa entre la enfermedad neurorretiniana no infecciosa no oportunista y el HIV/AIDS  B. El tipo de publicación no es bibliografía adecuada para una revisión sistemática (Reportes de caso/ Revisiones narrativas/Capítulos de libro/ Cartas al editor/ Informe de congresos |
